# Supplementary material for: Sensitive electrochemical determination of yohimbine in primary bark of natural aphrodisiacs using boron-doped diamond electrode
Source: Royal Society of Chemistry journal article supplement (doi:10.1039/c4ay00704b), 2014-01-01
Supplement: c4ay00704b1.pdf [file c4ay00704b1.pdf]

### Supplementary Material

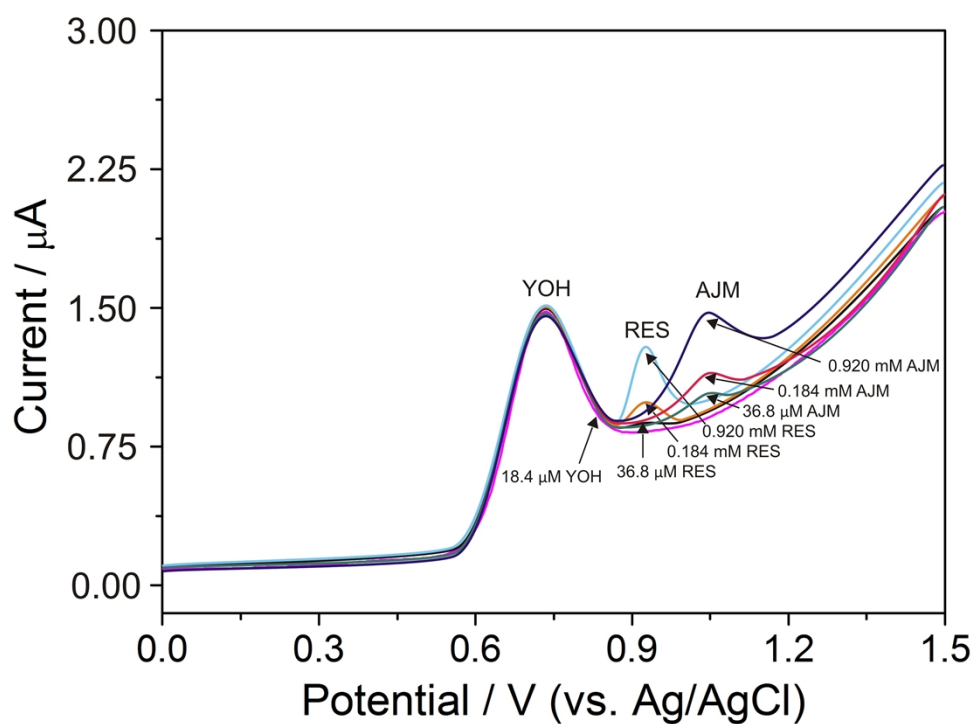

**S1** Effect of the presence of reserpine (RES) and ajmalicine (AJM) in their concentration excess of 2:1 (36.8  $\mu\text{M}$ ), 10:1 (0.184 mM) and 50:1 (0.920 mM) on current response of 18.4  $\mu\text{M}$  YOH.
